# Supplementary material
Source: PubMed Central journal article supplement (PMC1151592)
Supplement: nar_33_11_e97__2.pdf [file nar_33_11_e97__2.pdf]

# **Real-time investigation of nucleic acids phosphorylation process using molecular beacons**

**Zhiwen Tang, Kemin Wang,\* Weihong Tan, Changbei Ma, Jun Li, Lingfeng Liu,  
Qiuping Guo, Xiangxian Meng**

Biomedical Engineering Center

State Key Laboratory of Chemo/Biosensing and Chemometrics, Institute of Biological  
Technology, College of Chemistry and Chemical Engineering, Hunan University,  
Changsha 410082, P.R.China.

Email: kmwang@hnu.net.cn Tel:0731-882156

## Abstract

Phosphorylation of nucleic acids is an indispensable process to repair strand interruption of nucleic acids. We have studied the process of phosphorylation using molecular beacon (MB) DNA probes in real-time and with high selectivity. The MB employed in this method is devised to sense the product of a “phosphorylation-ligation” coupled enzyme reaction. Compared with the current assays, this novel method is convenient, fast, selective, highly sensitive and capable of real-time monitoring in a homogenous solution. The preference of T4 polynucleotide kinase (T4 PNK) has been investigated using this approach. The results revealed that a single-stranded oligonucleotide containing guanine at the 5' termini is most preferred, while those utilizing cytosine in this location are least preferred. The preference of (T)<sub>9</sub> was reduced greatly when phosphoryl was modified at the 5' end, implying that T4 PNK could discern the phosphorylated/unphosphorylated oligonucleotides. The increase of oligonucleotide length leads to an enhancement in preference. A fast and accurate method for assaying the kinase activity of T4 PNK has been developed with a wide linear detection range from 0.002 to 4.0 Unit/mL in 3 minutes. The effects of certain factors such as NTP, ADP, (NH<sub>4</sub>)<sub>2</sub>SO<sub>4</sub> and Na<sub>2</sub>HPO<sub>4</sub> on phosphorylation have been investigated. This novel approach enables us to investigate the interactions between proteins and nucleic acids in a homogenous solution, such as those found in DNA repair or in drug development.

**Comment [T1]:** Need to indicate which one you are referring to here, MB or DNA to be phosphorylated?

## Introduction

The phosphorylation of the 5'-hydroxyl termini of nucleic acids plays an important role in nucleic acid metabolism and is indispensable to for the repair of nucleic acids during strand interruption.<sup>1</sup> The nucleic acids lesions caused by some endogenous or exogenous agents, such as nucleases, as well as ionizing radiation and chemical agents, usually possess 5'-hydroxyl termini. These situations lead to the failure of 5'-phosphate termin dependent repair, repair processes for nucleic acids and result in a serious consequences. Phosphorylation of 5'-hydroxyl termini is an inevitable occurrence in many nucleic acid repair mechanisms. Since the first polynucleotide kinase was discovered over 30 years ago, the T4 polynucleotide kinase was found to be the RNA repair enzyme involved in the T4 bacteriophage infection process.<sup>2,3</sup> At present, the polynucleotide kinase is known to be widespread in cells and also considered to be a putative DNA repair enzyme that phosphorylates the 5'-hydroxyl of DNA and RNA.<sup>1-6</sup> Traditionally, radical isotope <sup>32</sup>P-labeling, (denature) PAGE, and autoradiography are used to assay the phosphorylation of nucleic acids.<sup>1-8</sup> Unfortunately, these approaches are complex, time consuming and discontinuous, and incapable of analyzing a rapid, continuous phosphorylation processes. Therefore, other avenues need to be explored to have a convenient, rapid and accurate method to investigate the phosphorylation of nucleic acids in real-time.

Here a novel method has been developed for the real-time monitoring of the phosphorylation process using molecular beacon DNA probes with high sensitivity, excellent selectivity and convenience. Molecular beacons (MBs) are hairpin shaped nucleic acid probes that possess high selectivity and excellent sensitivity.<sup>9-13</sup> MBs have been used in the investigation of genetic disease,<sup>14</sup> studies of DNA-protein interactions,<sup>15,16</sup> the monitoring of the nucleic acids ligation process,<sup>17</sup> the detection of DNA/RNA hybridization in living cells.<sup>18</sup> Our approach for real-time phosphorylation monitoring takes advantage of the inherent single transduction mechanism of MBs as shown in Figure 1.

- Deleted: sequential
- Deleted: nucleic acids
- Comment [T2]: Identify them, also add refs here.
- Deleted: requiring 5'-phosphate termini,
- Deleted: will
- Deleted: sequent
- Deleted: Hence, p
- Deleted: '
- Deleted: procedure
- Deleted: processes
- Deleted: , and is a significant cellular event
- Deleted: an
- Deleted: RNA repair enzyme involving the T4 bacteriophage infection process
- Deleted: a
- Deleted: presence
- Deleted: is
- Deleted: '
- Deleted: the
- Deleted: s phosphorylation process is assayed by radical isotope <sup>32</sup>P-labeling, (denature) PAGE, and autoradiography
- Deleted: The shortcomings
- Deleted: of
- Deleted: obvious: they are
- Deleted: satisfying
- Deleted: It is necessary for us to have
- Deleted: The desired evolution will provide a powerful tool to study this dynamic, living process. We
- Deleted: have developed a
- Deleted: a nucleic acid
- Deleted: ¶  
¶ Our approach to study the phosphorylation of nucleic acids in real time is based on
- Deleted: m
- Deleted: , which
- Deleted: ,
- Deleted: etc.
- Deleted: the
- Deleted: s
- Deleted: MBs in the scheme

In Figure 1, the oligo A, which contains a 5'-hydroxyl group, can be phosphorylated and, together with Oligo B, can be hybridized to the MB to form a ligatable nick. In the presence of DNA ligase, oligonucleotides can be ligated to open the MB, thereby restoring fluorescence. In this assay, the MB plays the role of an information converter, specifically transferring the information that an "oligo has been phosphorylated" into fluorescent signal changes. Thus, phosphorylation of a nucleotide can be monitored in real time using this principle.<sup>19</sup> Utilizing the excellent selectivity and high sensitivity of a MB and the rapid ligation feature of DNA ligase, this approach can offer selective, sensitive and simultaneous information about the phosphorylation process.

- Deleted: As illustrated i
- Deleted: with
- Deleted: '
- Deleted: ,
- Deleted: ,
- Deleted: therefore
- Deleted: with the
- Deleted: ese procedures
- Deleted: DNA ligase
- Deleted: a
- Deleted: as
- Deleted: a
- Deleted: that
- Deleted: orms
- Deleted: of
- Deleted: s have been phosphorylated
- Deleted: ce enhancement
- Deleted: , and this "Phosphorylation and Ligation" process is a typical enzyme coupled reaction
- Deleted: .
- Deleted: n

## Material and Methods

### Oligonucleotides and Reagents

The molecular beacons and oligonucleotides were synthesized by Dalian Takara Bio Inc. (Dalian, China), and T4 DNA ligase, E. coli DNA ligase, T4 polynucleotide kinase were purchased from the same company. Please see the unit definition of these enzymes in the supporting information. The index and sequences of the MBs and oligonucleotides are listed in Table 1.

- Deleted: the
- Deleted: are

### Sampling and fluorescence measurement

The two ligation systems employed in our experiments were T4 DNA ligase and E. coli DNA ligase. The buffer for the T4 DNA ligase contained 50 mM Tris-HCl (pH 8.0), 10 mM MgCl<sub>2</sub>, 1.0 mM ATP, while the E. coli DNA ligase buffer was composed of 50 mM Tris-HCl (pH 8.0), 10 mM MgCl<sub>2</sub>, 0.1 mM NAD. All of the samples were prepared in 80 μL aliquots for all

- Deleted: Of the t
- Deleted: ,
- Deleted: one was
- Deleted: the other was
- Deleted: .
- Deleted: .
- Deleted: 80 μL solution in

experiments. All fluorescence measurements of the samples were carried out on a F2500 (Hitachi, Japan) with excitation at 521 nm and emission at 578 nm for TMR labeling at 5' end of MB1 as a fluorophore. Each sample was incubated at 37 °C for 8 minutes to obtain equilibrium. After the addition of DNA ligase, the sample was incubated until the fluorescence reached equilibrium again. At this point T4 PNK was introduced into the solution followed by 4 seconds of stirring. The fluorescence was recorded simultaneously, and the phosphorylation velocity is represented by the maximum enhancement rate for the assay approach based on an enzyme-coupled reaction.

Comment [T3]: Is there any more names for this, i.e. 'fluorometer'??

Deleted: of the

Deleted: about

Deleted: a steady status

Deleted: before

Deleted: e, after

Deleted: which

Deleted: with

Comment [T4]: Add an addition sentence describing how you determined the maximum Fluorescence Rate, is it by derivatives of the FI vs. Time plots??

Deleted: synchronously

Deleted: was

Deleted: this novel

Comment [T5]: I have no idea what this phrase really means, are you referring to Mecalus-Menton Kinetics? Define this better here.

Deleted: .

Deleted: 1

Deleted: containing

Deleted: containing

Deleted: containing

Deleted: pertinent

Deleted: s

### MB\_1 Monitoring the Phosphorylation Process

Three samples were prepared to identify the features of MB1 in a 200nM concentration: sample A contained MB1 and cDNA; sample B contained MB1, Oligo A and Oligo B; and sample C contained only MB1. The fluorescence difference between the samples demonstrated the capability of MB1 to discern the different oligonucleotide sequences.

Deleted: In

Deleted: real time monitoring

Deleted: of nucleic acids experiment

To determine the enzymatic kinetics of the phosphorylation reaction, the aforementioned three samples were incubated at 37°C with the sequential addition of 1.4 Units of T4 DNA ligase and 3.0 Units of T4 polynucleotide kinase.

Deleted: basal

Deleted: novel

The solution for measuring the selectivity of this approach contained 200 nM MB1 and 300 nM Oligo A in *E. coli* DNA ligase buffer or T4 DNA ligase buffer. The oligonucleotides inspected in this experiment were Oligo B to Oligo E and OligoH to Oligo M, and each of them were mixed into the sample at a concentration of 300 nM. 25 Units of *E. coli* DNA ligase (or 1.4 Units of T4 DNA ligase) and 1.0 Unit of T4 PNK were used for each sample.

Deleted: every

### Assay of T4 PNK and Investigation of the Effects of External Factors

In the assay for T4 PNK kinase activity, samples were prepared with 400 nM MB1, 600 nM Oligo A and 600 nM Oligo B. Before the addition of T4 PNK at various concentrations (0.002 to 10.0 Unit/mL), T4 DNA ligase (1.4 Units) was introduced into each sample. The phosphorylation velocities of each sample were evaluated based on the fluorescence intensity versus time responses.

- Deleted: of our
- Deleted: experiments
- Deleted: 1.4 Units of
- Deleted: were
- Deleted:
- Deleted: from their respective time courses
- Deleted: ¶

In the experiments performed to determine the effects of external factors on the phosphorylation enzymatic reaction of T4 PNK, the T4 DNA ligase based assay system was employed to investigate the affects of  $(\text{NH}_4)_2\text{SO}_4$  and  $\text{Na}_2\text{HPO}_4$ . The *E. coli* ligase based assay samples were used to explore the effects of NTP and ADP, because NTP is an indispensable cofactor for T4 DNA ligase. All samples contained 200 nM MB1, 300 nM OligoA, 300 nM OligoB and the desired reagent at the optimal concentrations for ????. The T4 DNA ligase, *E. coli* DNA ligase and T4 PNK used in these experiments are 1.4 Units, 25 Units and 0.05 Unit respectively, which assured that the activity of the ligase was much greater than T4 PNK.

- Deleted: process
- Deleted: catalyzed by
- Deleted: that
- Deleted: , while t
- Comment [T6]: If they are proper, it is implied that there is an importance. Do you mean to say, 'optimal' concentrations?
- Deleted: proper
- Formatted: Highlight
- Comment [T7]: Why is this important?

### Investigation of T4 PNK Preference for Substrates

A series of oligonucleotides (Oligo G through Oligo M) were mixed into the phosphorylation sample at 300 nM respectively to explore the preference of T4 PNK for various substrates. The phosphorylation process was activated by the addition of 0.3 Unit T4 DNA ligase and 0.015 Unit T4 PNK. A series of ligation reactions were carried out to determine the effects of various oligonucleotides on the T4 DNA ligase system. The ligation samples were prepared with T4 DNA ligase buffer mixed with 200 nM MB1, 300 nM Oligo A and 300 nM Oligo F. Except for the standard ligation solution, the Oligo G to Oligo M was introduced into the ligation sample at a concentration of 300 nM. T4 DNA ligase (0.3 Units) was added into each ligation reaction, and the ligation rates were determined based on the rate of change in the initial fluorescence intensities.

- Deleted: To explore the preference of T4 PNK for various substrates
- Deleted: , a
- Deleted: to
- Deleted: , t
- Deleted: hen t
- Deleted: measured
- Deleted: respectively
- Deleted: 0.3 Units of
- Deleted: were
- Deleted: calculated
- Deleted: by
- Deleted: enhancement velocity

## Results and Discussion

### Real-time Monitoring of Nucleic Acids Phosphorylation

The fluorescence enhancement of MB1 with cDNA is about 28 times higher than MB1 with Oligo A and Oligo B (see Figure S-1 in supporting information). The result demonstrated that MB1 has high sensitivity to distinguish oligos before/after ligation upon hybridizing with them. This interesting feature of MB1 establishes the groundwork for monitoring phosphorylation of nucleic acids in homogenous solutions. The fluorescence intensity of the samples was monitored and the time courses were plotted in Figure 2 (Left).

**Comment [T8]:** Need a sentence or two here before this sentence to transition to the results. Setup the importance of the experiment.

**Deleted:** shows

**Deleted:** of

**Deleted:** nucleic acids

**Deleted:** in a homogenous solution

**Comment [T9]:** Tell the reader the point of this experiment. Need to transition here better.

As illustrated in Figure 2 (Left), after the addition of T4 DNA ligase and T4 polynucleotide kinase, there was no fluorescence change in curves A and C (corresponding to samples A and C respectively). Even in the presence or absence of the target oligos, MB1's conformation was not affected by the T4 DNA ligase and T4 polynucleotide kinase. The only factor that could affect the conformation of MB1 altering its fluorescence was the presence of the target cDNA hybridizing with MB1.

**Deleted:** This result implied that, in spite of

**Comment [T10]:** In General, you should changes this acronym for complementary DNA. It is the commonly used term for the complementary strand of DNA that is made in the nucleus when the DNA is transcribed to RNA.

In sample B, which is represented by curve B (Figure 2) after the addition of T4 DNA ligase, the fluorescence did not change. After the addition of T4 polynucleotide kinase, the fluorescence was enhanced rapidly, implying MB1's hybridization with the target oligo. According to the mechanism demonstrated in Figure 1, a "phosphorylation and ligation" enzyme coupled reaction took place, and the newly produced oligo could "open" MB1 by hybridizing with the loop of MB1. Furthermore, the time course of sample B formed an "S-shaped" curve, which is a significant characteristic of an enzyme-coupled reaction. Hence, the phosphorylation rate can be evaluated by the increasing rate of fluorescence change, instead of the initial signal changes.

**Deleted:** stretch

**Deleted:** , implying that the reaction investigated is an enzyme coupled reaction

**Deleted:** should

**Deleted:** a

**Deleted:** maximum

**Deleted:** increasing rate

These results indicate that the phosphorylation of nucleic acids can be monitored in real time by this approach.

- Deleted: Based upon the above data
- Deleted: ,
- Deleted: novel

To determine the optimal T4 polynucleotide kinase (T4 PNK) concentration for the assay, a series of reactions were investigate which contained varying amounts T4 PNK. The time courses are shown in Figure 2 (Right). The results indicated that the fluorescence enhancement rate increases with an increasing concentration of T4 polynucleotide kinase. With the enzyme ranging from 0.002 Unit/mL to 4.0 Unit/mL, the maximum rate of fluorescence increased proportionally to the concentration of T4 polynucleotide kinase, and the detection time was limited to 3 minutes (see Figure S-2 in supporting information). Based on a 3 minute reaction time, the detection limits for T4 PNK were determined to be ?????. In comparison to other techniques this (HOW MUCH???) more sensitive. This assay is convenient, quick and sensitive, and has a wide dynamic range, which makes it a useful approach to analyze the kinase activity of T4 polynucleotide kinase.

- Deleted: We investigated a
- Deleted: took place at various
- Deleted: concentrations of
- Deleted: polynucleotide kinase
- Deleted: manifests
- Deleted: , along with the increase of T4 polynucleotide kinase's concentration
- Deleted: ,
- Deleted: is
- Deleted: d
- Deleted: e is
- Deleted: directly
- Deleted: is correspondingly
- Comment [T11]: This information is important since you make the claim the assay is sensitive.
- Formatted: Highlight

### High Selectivity for Substrates

Due to the high selectivity of the MB and the high fidelity of DNA ligase, the approach should demonstrate a high specificity for its substrates. The selectivity of the assay was evaluated by the maximum rate of fluorescence change for samples with varying substrates. The Oligo B, Oligo C, Oligo D and Oligo E have similar sequences but varying nucleotides at the 5' termini (Oligo B is complementary to the loop sequence of MB1). The sequences of Oligo H to Oligo M were were designed to be non-complementary and un-hybridizable to MB1. They were introduced into the phosphorylation samples based on *E. coli* DNA ligase or T4 DNA ligase. The results were normalized by data from OligoB and listed in Figure 3 (data for Oligo I to Oligo M not shown).

- Deleted: is
- Deleted: has
- Deleted: specificity
- Deleted: enhanced
- Deleted: intensity
- Deleted: in
- Deleted: variant
- Deleted: '
- Deleted: , whereas
- Deleted: matches
- Deleted: 's loop
- Deleted: irrelative with MB1.



In Figure 3, the phosphorylation rates of Oligo B, Oligo C, Oligo D, Oligo E and Oligo H with *E. coli* DNA ligase are 1.00, 0.005, 0.006, 0.005 and 0.000 respectively, while the data of samples based on T4 DNA ligase are 1.00, 0.79, 0.65, 0.64 and 0.001. The results of Oligo I to Oligo M were similar to that of Oligo H, so their results were skipped in Figure 3. The assay based on *E. coli* DNA ligase has more selectivity than the one based on T4 DNA ligase, because the *E. coli* DNA ligase possesses higher fidelity than T4 DNA ligase. But in random nucleotides that are non-correlative to the assay components, such as OligoH to Oligo M, the selectivity was very high for both ligation assays. These results suggested that this method could distinguish the phosphorylation of a matching target significantly from three other similar oligos with only one base alteration at the 5' terminus. High specificity makes this method capable of researching phosphorylation of a target oligo within a homogeneous solution containing diversified oligos in real time, without any separation treatments.

**Comment [T12]:** It seems like an experiment is missing that might be helpful for the reader. What is the sensitivity of the MB to the Oligos you are studying here? Do the sequences have the capability to bind the MB and partially open the MB stem??

**Deleted:** It's obviously that t

**Deleted:** two

**Deleted:** '

**Deleted:** diversiform

**Comment [T13]:** This statement is untrue according to the results presented. You haven't analyzed a mixture. You only looked at pure samples.

### The Preference of T4 Polynucleotide Kinase

When polynucleotide kinase was introduced into a solution containing varied oligonucleotides with a 5' hydroxyl, the phosphorylation process would occur. The phosphorylation speed and efficiency of these oligonucleotides might be different with varied sequences, length and chemical modifications. Some prior research has revealed the differences in phosphorylation efficiency **ADD REFS**. These results were probably caused by the substrate preference of polynucleotide kinase. We have designed a convenient way to explore the preferences of varied oligonucleotides by employing the high selectivity of this novel monitoring method. When the inspected oligonucleotides were introduced into the phosphorylation solution, the reaction rate was affected. Polynucleotide kinase should work on the added oligonucleotides. The higher the preference for the oligonucleotide, the more time polynucleotide kinase will spend ligating it. Slower phosphorylation rates are expected for less preferential sequences. Therefore, the preference of various oligonucleotides can be investigated by comparing the decrease in the

**Deleted:** '

**Formatted:** Highlight

**Deleted:** was

**Deleted:** existing

**Comment [T14]:** I have no clue why this is here? Why wouldn't it work?

**Deleted:** would

**Deleted:** be

**Comment [T15]:** I am unclear what you mean here.

**Deleted:** new

**Deleted:** possesses

**Deleted:** on it

**Deleted:** and correspondingly the slower phosphorylation rate of the existing reaction would be inspected.

phosphorylation rate. In addition, the effects of the oligonucleotides on ligation can be investigated to calibrate their influence upon a ligation-based assay. The preference can be evaluated by the following formulas:

Deleted: have been  
Deleted: inspected

$$V_{P_i} = N_{P_i} * V_{P_0} = P_{i_0} * N_{L_i} * V_{P_0}$$

where the  $V_{P_i}$  is the phosphorylation rate of a sample mixed with the studied oligonucleotide. The  $V_{P_0}$  represents the phosphorylation rate of a standard assay sample (which does not contain the investigated oligonucleotide). The  $N_{P_i}$  represents the effect ratio on the phosphorylation assay. This novel assay is based on a "phosphorylation-ligation" enzyme coupled reaction, so the  $N_{P_i}$  is composed of two fractions: the  $P_{i_0}$  which is the "original" effect of a certain oligonucleotide on the phosphorylation process that has excluded the effect on ligation, and the  $N_{L_i}$  which characterizes the effect of the substrate on standard ligation. Then:

$$N_{P_i} = V_{P_i} / V_{P_0} \quad N_{L_i} = V_{L_i} / V_{L_0}$$

$$P_{i_0} = N_{P_i} / N_{L_i}$$

$$P_i = 1 - P_{i_0}$$

where the  $V_{L_0}$  represents the ligation rate of the standard ligation sample. The  $V_{L_i}$  is the ligation rate of one sample, and the  $P_i$  represents the ratio by which one oligonucleotide decreased the phosphorylation reaction compared to the standard sample. It's apparent that the greater the  $P_i$  is, the higher the preference would be for the oligonucleotide. Therefore,  $P_i$  was used in this study to characterize the preference of T4 PNK for substrates.

Deleted: obviously  
Deleted: of this  
Deleted: would be

A series of three experiments were designed: (1) exploring the preference of oligonucleotides with one base alteration at 5' terminus (Oligo H to Oligo K), (2) studying the effects of length on

Deleted: ,  
Deleted:  
Deleted: one to  
Deleted: e  
Deleted: '  
Deleted: another to study

preference (Oligo L, Oligo H and Oligo M), and (3) investigating the effect of phosphate/hydroxyl at 5' end (Oligo G and Oligo H). In these experiments, the concentrations of T4 DNA ligase and T4 polynucleotide kinase were 3.7 Unit/mL and 0.2 Unit/mL, which meet the requirements for an enzyme coupled reaction and ensures that the T4 polynucleotide kinase was not in excess for these substrates. The results were normalized by data from OligoH, which was a common component in all three groups of experiments (Figure 4).

- Deleted: a third
- Deleted: to
- Deleted: e
- Deleted: confirmed
- Comment [T16]: This makes no sense. What do you mean by 'enzyme coupled reaction'
- Deleted: the condition of
- Deleted: d
- Comment [T17]: Why is this important, it is very unclear?
- Deleted: for it
- Deleted: studied

It can be concluded from Figure 4 that Oligo I, possessing a guanine at the 5' end, resulted in the highest preference; while Oligo K, having a cytosine at the 5' end, resulted in the lowest preference. The similar patterns observed between preference and phosphorylation efficiency suggested that there might be a correlation between them.<sup>20</sup> These experiments revealed an interesting phenomenon that the preference of Oligo G, which is the same sequence as Oligo H but has a phosphate at the 5' end, showed less preference than Oligo H. This result implied that the T4 polynucleotide kinase could distinguish the phosphate/hydroxyl at the 5' end of the nucleotide and skip the phosphorylated oligonucleotide. Oligos H, L, and M, which were the same sequence at the 5' end but varied in length, had different preferences, indicating that the T4 polynucleotide kinase is sensitive to the length of the oligonucleotides. Based on this principle, other factors may affect the preference, such as double-stranded oligonucleotides, and hairpin-shaped oligonucleotides, and these can be studied conveniently and precisely. Further research into the preference of T4 PNK may be helpful to understanding the ligation mechanism.

- Deleted: . All normalized data are illustrated in
- Deleted: , among Oligo H to Oligo K,
- Deleted: the
- Deleted: '
- Deleted: got
- Deleted: got
- Deleted: tendency
- Comment [T18]: For this sentence to make sense, you need to describe the results of this REF a little bit.
- Deleted: in
- Deleted: '
- Deleted: a great decrease
- Deleted: '
- Comment [T19]: What do you mean here???? Change this word.
- Deleted: in
- Deleted: '
- Deleted: heading
- Deleted: got
- Deleted: the
- Deleted: etc
- Deleted: ..
- Deleted: its'

### Effects of external factors

The effects of ribonucleoside triphosphates, ADP, sodium hydrogen phosphate and ammonium sulfate on phosphorylation have been studied employing this approach. The *E. coli* DNA ligase-based assay was employed to explore the effects of ribonucleoside triphosphates, ADP and ammonium sulfate. These chemicals are known to not inhibit *E. coli* DNA ligase ligation, which

- Deleted: our
- Deleted: simple
- Deleted: based
- Deleted: , because t
- Deleted: do not depress
- Deleted: based
- Deleted: production

may affect the results of the enzyme coupled reaction. The sodium hydrogen phosphate greatly reduced the ligation catalyzed by *E. coli* DNA ligase, as well as a moderate inhibition for the T4 DNA ligase-based assay. Hence, the T4 DNA ligase based assay was chosen for studying the effects of sodium hydrogen phosphate. All of these experiments were performed in excess of DNA ligase to ensure the results were according to the enzyme coupled reaction condition<sup>19</sup>

Comment [T20]: Again, what do you mean by this expression???

Deleted: caused a great reduction

Deleted: in

Deleted: depression

Deleted: to

Deleted:

Deleted: ligation

Deleted: with a great

Comment [T21]: What are these conditions????????? Optimal enzymatic rate conditions, not substrate limiting.

Deleted: precise

Deleted: (

Deleted: )

Deleted: Around

Deleted: climax

Deleted: decline

Deleted: ese

Deleted: depression

Deleted: effects

Deleted: a

Deleted: the

Deleted: , for

Deleted: are

Deleted: Therefore

Deleted: was

Deleted: block to some degree.

Deleted: The increase

Deleted: ,

Deleted: and t

Deleted: because

Deleted: nucleic acids

Deleted: process

Deleted: is a reversible reaction, and

Deleted: would cause the reverse reaction

Deleted: depress

Deleted: depress

Comment [T22]: Drugs were not studied, leave this to the conclusion only.

Deleted: , which means that it can probably be used widely in drug studies.

Deleted: ¶

Deleted: novel

Deleted: e

The absence of ATP led to the blockage of the phosphorylation process. At a concentration of 125 μM, phosphorylation rates with ATP reached its maximum. While the concentration of ATP was higher than 1.0 mM, a slight decrease in the rate was observed. The CTP, GTP and UTP produced similar effects on phosphorylation (see Figure S-3 for supporting information). This slight inhibition caused by higher concentrations of nucleoside-triphosphates on the phosphorylation reaction is probably due to a competitive binding reaction as a result of the nucleoside-triphosphates being analogous substances to T4 PNK. As a result, the binding site of T4 PNK is partially blocked. Increasing concentrations of ADP resulted in a decrease of the phosphorylation rate. The presence of 6.0 mM ADP led to a 50% decrease in the phosphorylation rate. This is due to the reversibility of the phosphorylation reaction in the presence of ADP and 5'-phosphoryl nucleic acids. Both ammonium sulfate and sodium hydrogen phosphate greatly inhibited the phosphorylation process. The addition of 20 mM (NH<sub>4</sub>)<sub>2</sub>SO<sub>4</sub> or 15 mM Na<sub>2</sub>HPO<sub>4</sub> can inhibit phosphorylation by about 50%. The effect of Na<sub>2</sub>HPO<sub>4</sub> is similar to the phosphate reported in previous research.<sup>21</sup> The results showed that this approach can explore the various effects on phosphorylation quickly and accurately.

## Conclusion

In summary, we have, for the first time, developed a approach for real time monitoring of nucleic acid phosphorylation based on molecular beacon DNA probes. The MB employed in this method is devised to monitor the product of a “phosphorylation-ligation” coupled enzymatic

reaction. Compared to current assay methods, this approach is convenient, quick and highly sensitive. It has excellent selectivity and is capable of real-time monitoring in a homogenous solutions. The preference of T4 PNK has been studied in detail, and the effects of a few external factors on phosphorylation have been investigated. The monitoring of the oligonucleotide dephosphorylation processes and exchange reactions could also be studied, which would enable the real-time monitoring of the phosphorylation and dephosphorylation processes simultaneously. The approach is a potentially useful tool in researching the interactions between proteins and nucleic acids in homogenous solutions, such as DNA repair, or drug research and development.

Deleted: novel

Deleted: specificity

Deleted: synchronously

Deleted: Our novel

## References

1. Wang, L. K., Lima, C. D., Shuman, S. Structure and mechanism of T4 Polynucleotide Kinase: an RNA repair enzyme. EMBO J. 2002, 21(14), 3873-3880.
2. Richardson, C. Phosphorylation of nucleic acid by an enzyme from T4 bacteriophage-infected Escherichia coli. Proc. Natl. Acad. Sci. USA. 1965, 54(1), 158-165.
3. Amitsur, M., Levitz, R., Kaufmann, G. Bacteriophage T4 anticodon nuclease, polynucleotide kinase and RNA ligase reprocess the host lysine tRNA. EMBO J. 1987, 6(8), 2499-2503.
4. Whitehouse, J., Taylor, R. M., Thistlethwaite, A., Zhang, H., Karimi-Busheri, F., Lasko, D. D., Weinfeld, M., Caldecott, K. W. XRCC1 stimulates human polynucleotide kinase

- activity at damaged DNA termini and accelerates DNA single-strand break repair. *Cell*, 2001, 104(1): 107-17.
5. Meijer, M., Busheri, F. K., Huang, T. Y., Weinfeld, M., Young, D. Pnk1, a DNA Kinase/Phosphatase Required for Normal Response to DNA Damage by r-Radiation or Camptothecin in *Schizosaccharomyces pombe*. *J. Biol. Chem.* 2002, 277(6), 4050-4055.
  6. David, M., Wilson, III., Larry, H. T. Life without DNA repair. *Proc. Natl. Acad. Sci. USA*. 1997, 94, 12754-12757.
  7. Wang, L. K., Shuman, S. Domain Structure and Mutational Analysis of T4 Polynucleotide kinase. *J. Biol. Chem.* 2001, 276(29), 26868-26874.
  8. Busheri, K., Daly, G., Robins, P., Canas, B., Rappin, D. J. C., Sgouros, J., Miller, G. G., Fakhrai, H., Davis, E. M., Beau, M. M. L., Weinfeld, M. Molecular Characterization of a Human DNA Kinase. *J. Biol. Chem.* 1999, 274(34), 24187-24194.
  9. Tyagi, S., Kramer, F. R. Molecular beacons: probes that fluoresce upon hybridization. *Nat. Biotech.* 1996, 14, 303-308.
  10. Santangelo, P. J., Nix, B., Tsourkas, A., and Bao, G., Dual FRET molecular beacons for mRNA detection in living cells, *Nucleic Acids Research*. 2004, 32(6), e57.
  11. Molecular beacons, Weihong Tan, K. Wang and Timothy Drake, *Curr Opin Chem Biol*, **2004**, 8 (5), 547-553; Fang, X., Li, J. J., John, P., Tan, W., Wang, K. Molecular beacons: novel fluorescent probes. *Anal. Chem.* 2000, 72(23), 747A-753A.
  12. Nitin, N., Santangelo, P. J., Kim, G., Nie, S. and Bao, G., Peptide-linked molecular beacons for efficient delivery and rapid mRNA detection in living cells, *Nucleic Acids Research*. 2004, 32, 6 e58.
  13. Zhang, P., Beck, T., Tan, W. Design of a molecular beacon DNA probe with two fluorophores. *Angew. Chem. Int. Ed.* 2001, 40(2), 402-405.
  14. Tyagi, S., Bratu, D. P., Kramer, F. R. Multicolor molecular beacons for allele discrimination. *Nat. Biotech.* 1998, 16, 49-53.
  15. Li, J. J., Fang, X., Schuster, S. M., Tan, W. Molecular beacons: a novel approach to detect protein - DNA interactions. *Angew. Chem. Int. Ed.* 2000, 39, 1049-1052.
  16. Li, J. J., Geyer, R., Tan, W. Using molecular beacons as a sensitive fluorescence assay for enzymatic cleavage of single-strand DNA. *Nucl. Acids. Res.* 2000, 28, e52.
  17. Tang, Z., Wang, K., Tan, W., Li, J., Liu, L., Guo, Q., Meng, X., Ma, C., Huang, S. Real-time monitoring the nucleic acids ligation in homogenous solution using molecular beacon. *Nucl. Acids. Res.* 2003, 31, e148.

18. Sokol, D. L., Zhang, X., Lu, P., Gewirtz, A. M. *Proc. Natl. Acad. Sci. USA.* **1998**, *95*, 11538-11543.
19. Copeland, R. A. *Enzymes: A Practical Introduction to Structure, Mechanism, and Data Analysis*, 2nd ed., Wiley-VCH, Inc.: New York, 2000.
20. Houten, V., Denkers, F., Dijk, M., Brekel, M., Brakenhoff, R. Labeling efficiency of oligonucleotides by T4 polynucleotide kinase depends on 5'-nucleotide. *Anal. Biochem.* 1998, *265*, 386-389.
21. Lillehaug, J. R., Kleppe, K. Effect of salts and polyamines on T4 polynucleotide kinase. *Biochemistry.* 1975, *14*(6), 1225-1229.

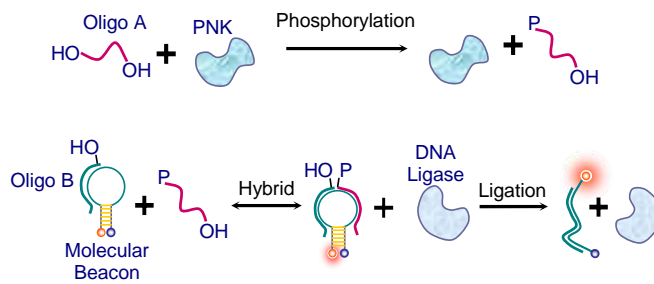

**Figure 1.** Schematic for monitoring the phosphorylation of nucleic acids. (Up) The Oligo A with 5'-hydroxyl is phosphorylated by polynucleotide kinase. (Bottom) The nick formed by Oligo B and phosphorylated Oligo A hybridizing with MB can be sealed by DNA Ligase, which results in a fluorescence enhancement of the MB probe.

Deleted: of

Deleted: '

Deleted: greatly enhances the fluorescence



**Table 1.** Molecular beacon and target oligonucleotide sequences.

| Index   | Sequence (5' to 3')                                                    |
|---------|------------------------------------------------------------------------|
| MB1     | (TMR)- <b>CCTCTC</b> CGTGTCTTGTACTTCCCGTCA <b>GAGAGG</b> -<br>(DABCYL) |
| cDNA    | GACGGGAAGTACAAGACAC                                                    |
| Oligo A | p-GACGG GAAG                                                           |
| Oligo B | TACAA GACAC                                                            |
| Oligo C | CACAA GACAC                                                            |
| Oligo D | AACAA GACAC                                                            |
| Oligo E | GACAA GACAC                                                            |
| Oligo F | p-TACAA GACAC                                                          |
| Oligo G | p-TTTTTT TTTT                                                          |
| Oligo H | TTTTTT TTTT                                                            |
| Oligo I | GTTTTT TTTT                                                            |
| Oligo J | ATTTTT TTTT                                                            |
| Oligo K | CTTTTT TTTT                                                            |
| Oligo L | TTTTTT T                                                               |
| Oligo M | TTTTTT TTTTT TTTTT                                                     |

The stem part of MB1 was spell out in bold characters. The p in Oligo A, Oligo F and Oligo G represented the phosphate at 5' end.

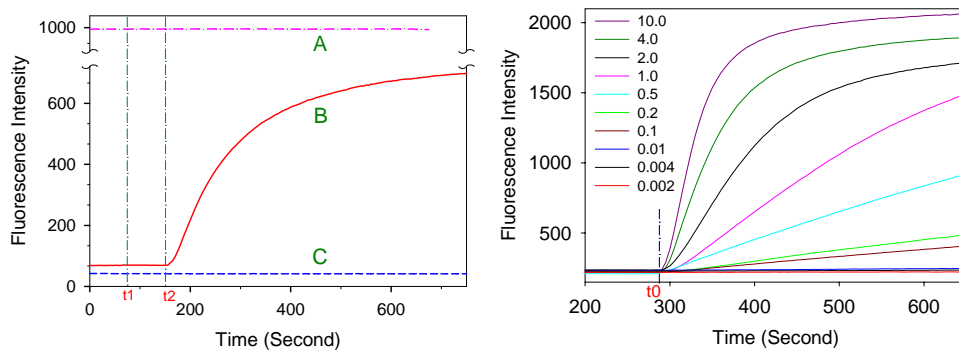

**Figure 2.** (Left) Monitoring of the phosphorylation reactions in real time. The curves A, B and C represent the time courses of samples A, B and C, respectively. At time  $t_1$ , T4 DNA ligase was added into the samples, while at time  $t_2$ , T4 polynucleotide kinase was added. (Right) Time courses of real time monitoring of the phosphorylation process catalyzed by various concentrations of T4 polynucleotide kinase (in Unit/mL). T4 polynucleotide kinase was added at time  $t_0$ .

Deleted: nucleic acids

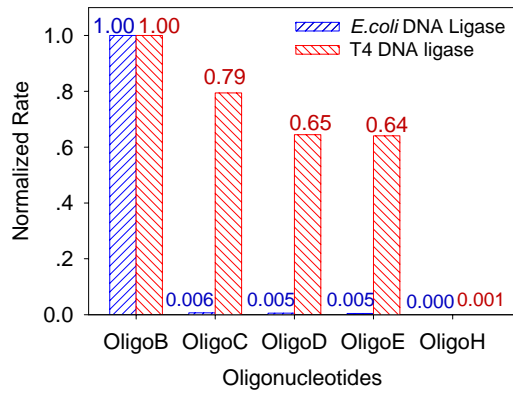

**Figure 3.** Specificity for substrates in phosphorylation reactions. The phosphorylation rate with various substrates is plotted. All data are normalized according to Oligo B that is complementary to the loop sequence of MB1.

- Deleted: was
- Deleted: were
- Deleted: matches

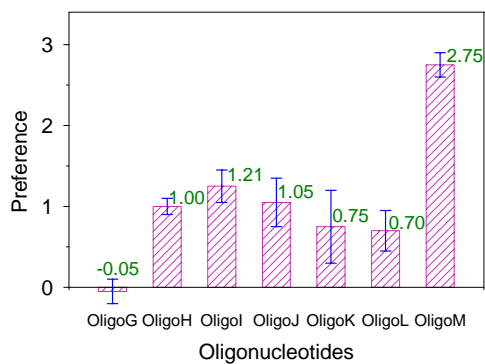

**Figure 4.** Preference of T4 PNK for substrates. Preferences of Oligo G to Oligo M are normalized according to the data of Oligo H. The preference value and error bar of each oligonucleotide's are indicated at the top of each column.

Deleted: were

Deleted: labeled

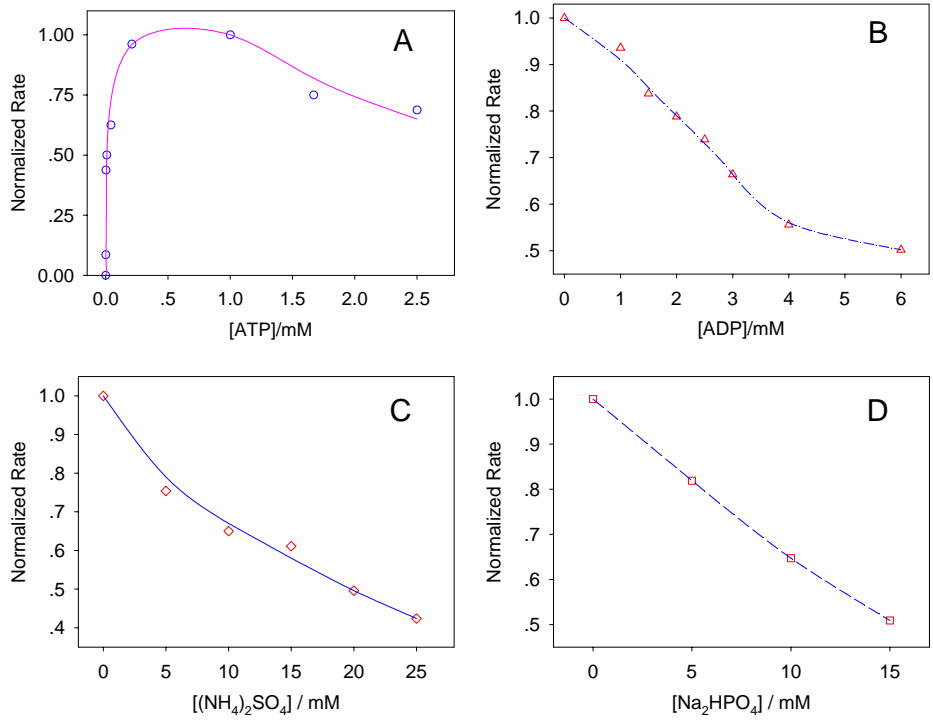

**Figure 5.** Effects of external factors on phosphorylation reactions. All data is normalized to the sample that had the highest phosphorylation rate.

Deleted: were  
Deleted: by
